# Supplementary material for: Pyrrolic-nitrogen doped graphene: a metal-free electrocatalyst with high efficiency and selectivity for the reduction of carbon dioxide to formic acid: a computational study
Source: Royal Society of Chemistry journal article supplement (doi:10.1039/c5cp07458d), 2016-01-01
Supplement: c5cp07458d1.pdf [file c5cp07458d1.pdf]

## **Supporting Information**

**Pyrrolic-nitrogen doped graphene: a metal-free electrocatalyst with high efficiency and selectivity for the reduction of carbon dioxide to formic acid: a computational study**

Yuejie Liu,<sup>‡</sup> Jingxiang Zhao<sup>†,\*</sup> Qinghai Cai<sup>†,‡</sup>

<sup>†</sup> *College of Chemistry and Chemical Engineering, Harbin Normal University, Harbin 150025, China*

<sup>‡</sup> *Modern Lab Center, Harbin Normal University, Harbin 150025, China*

\* To whom correspondence should be addressed. Email: [xjz\\_hmily@163.com](mailto:xjz_hmily@163.com) (JX)

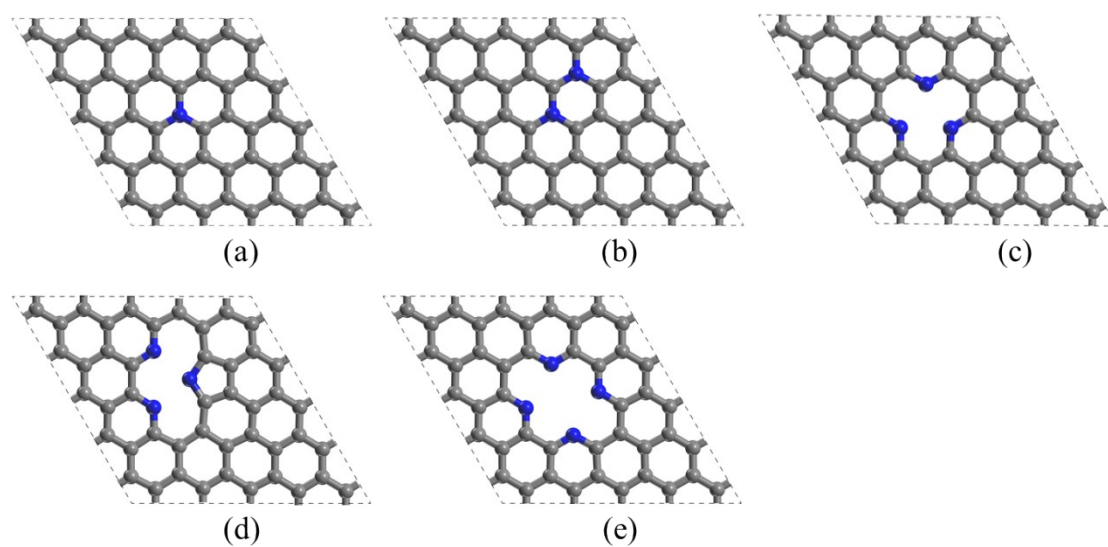

**Figure S1.** The optimized structures of different N-doped graphenes: (a) graphN1, (b) graphN2, (c) pyriN3, (d) pyrroN3, and (e) pyriN4. The gray and blue balls represent the C and N atoms, respectively.

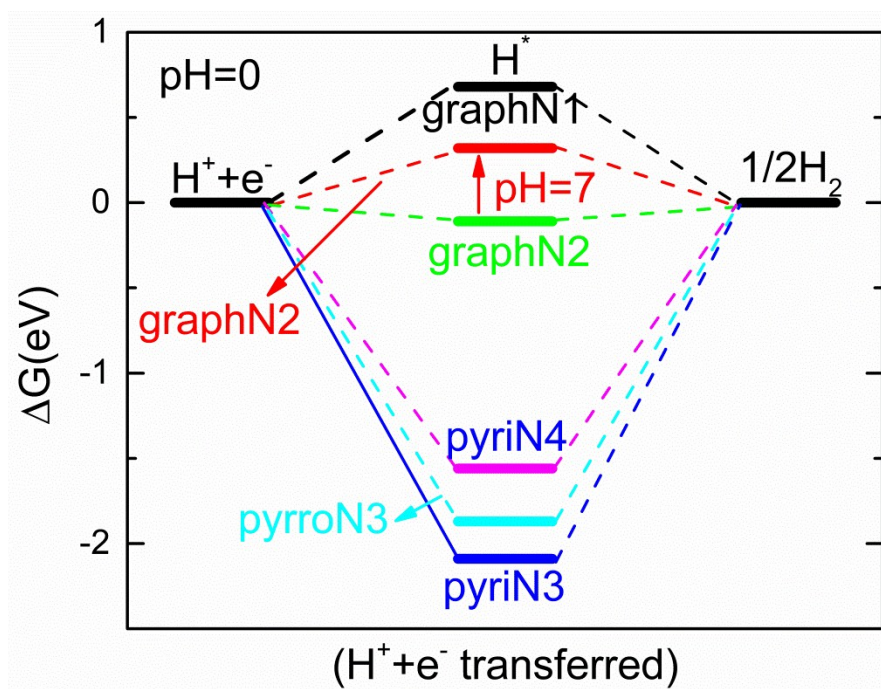

**Figure S2.** Free energy diagram of HER on various N-doped graphenes.

**Table S1.** The N content, shortest C-N bond length ( $d_{\text{C-N}}$ , Å) and formation energies ( $E_{\text{f}}$ , eV) of different N-doped graphenes.

|                  | graphN1 | graphN2 | pyriN3 | pyrroN3 | pyriN4 |
|------------------|---------|---------|--------|---------|--------|
| N, wt %          | 2.33    | 4.64    | 7.07   | 7.07    | 9.59   |
| $d_{\text{C-N}}$ | 1.408   | 1.398   | 1.338  | 1.323   | 1.330  |
| $E_{\text{f}}$   | 0.83    | 2.05    | 3.30   | 5.71    | 3.67   |
